# Supplementary material for: A randomized controlled trial testing a hyaluronic acid spacer injection for skin toxicity reduction of brachytherapy accelerated partial breast irradiation (APBI): a study protocol
Source: PubMed Central journal article supplement (PMC6298013; doi:10.1186/s13063-018-3035-3), 2018-12-17
Supplement: 13063_2018_3035_MOESM2_ESM.pdf [file 13063_2018_3035_MOESM2_ESM.pdf]

## EMC 16-400

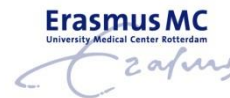

### A MULTICENTER RANDOMIZED CONTROLLED TRIAL TESTING HYALURONIC ACID SPACER INJECTION FOR SKIN TOXICITY REDUCTION OF PERMANENT BREAST SEED IMPLANT (PBSI)

#### CASE REPORT FORM (CRF)

#### A MULTICENTER RANDOMIZED CONTROLLED TRIAL TESTING HYALURONIC ACID SPACER INJECTION FOR SKIN TOXICITY REDUCTION OF PERMANENT BREAST SEED IMPLANT (PBSI)

Principal Investigator: Prof. dr. J.P. Pignol

Co-investigator: Drs. G. Struik

Protocol version: Mar 2018 (version 5)

Note: this CRF was built as an e-CRF in OpenClinica

## A MULTICENTER RANDOMIZED CONTROLLED TRIAL TESTING HYALURONIC ACID SPACER INJECTION FOR SKIN TOXICITY REDUCTION OF PERMANENT BREAST SEED IMPLANT (PBSI)

### Overview of events and CRF

The CRF's are divided over the following events:

- Baseline
- Treatment
- Follow-up 2M, 6M, 1YR, 2YR, 3YR, 4YR, 5YR, 10YR
- Recurrence
- Off-study

### Randomization Form will be built separately in ALEA (\*)

This form will contain basic patient characteristics, and a selection of the eligibility criteria:

- Date of birth → calculated age,  $\geq 50$  years (yes/no)
- Surgery: BCS+ axillary lymph node dissection or BCS + sentinel lymph node biopsy, (yes/no)
- *Histological* diagnosis: IDC or DCIS, (yes/no)
- *Conditional question:*
  - o if IDC: Surgical margins clear at ink or re-excision negative (yes/no)
  - o if DCIS: Surgical margin  $\geq 2$ mm or re-excision negative (yes/no)
- Tumor size (mm),  $\leq 30$ mm (yes/no)
- Nodal status (positive/negative)
- Lymphovascular invasion (yes/no)
- Known allergy for hyaluronic acid (yes/no)
- Neo-adjuvant chemotherapy (yes/no)
- PBSI technically feasible (yes/no)
- Any other exclusion criterion (yes/no)
- Date of written informed consent

## EMC 16-400

### A MULTICENTER RANDOMIZED CONTROLLED TRIAL TESTING HYALURONIC ACID SPACER INJECTION FOR SKIN TOXICITY REDUCTION OF PERMANENT BREAST SEED IMPLANT (PBSI)

- Date of randomization
- Randomization result
- Subject IDnr

(\*) export of data any time in agreement with CTC

**PROMs will be collected in ABC Zorgmonitor: QLQ-C30/BR23, EQ-5D, BCTOS**

**Additional questionnaires not yet in Zorgmonitor: BCTOS at BL, 2M, YR1 and YR2**

**A MULTICENTER RANDOMIZED CONTROLLED TRIAL TESTING HYALURONIC ACID SPACER INJECTION FOR SKIN TOXICITY REDUCTION OF PERMANENT BREAST SEED IMPLANT (PBSI)**

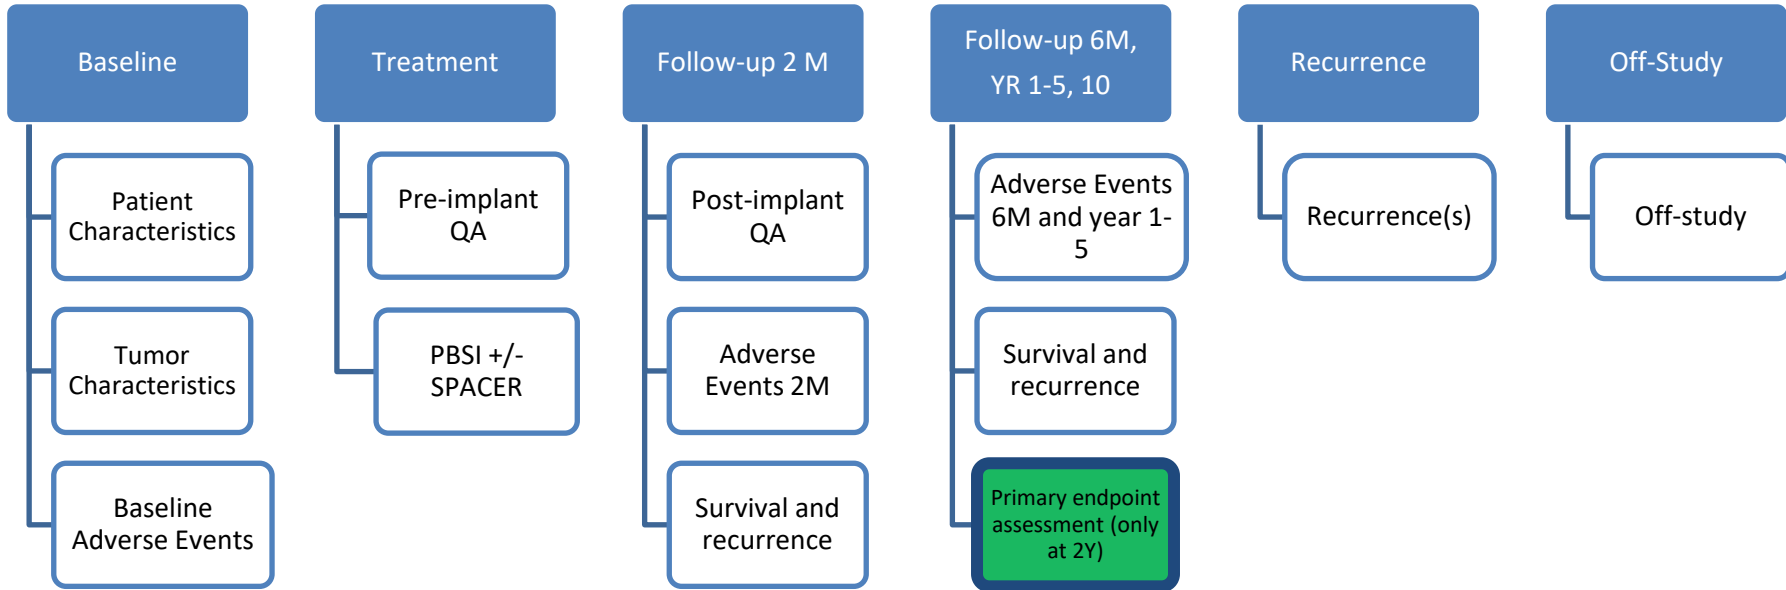

## EMC 16-400

### A MULTICENTER RANDOMIZED CONTROLLED TRIAL TESTING HYALURONIC ACID SPACER INJECTION FOR SKIN TOXICITY REDUCTION OF PERMANENT BREAST SEED IMPLANT (PBSI)

#### CRF: Patient Characteristics

|            |                                          |                                                                               |
|------------|------------------------------------------|-------------------------------------------------------------------------------|
| [DOR]      | Date of randomization                    | DD / MM/ YYYY                                                                 |
| [AGE]      | Age at registration                      | _ _ _                                                                         |
| [ALLINCL]  | Did patient meet all inclusion criteria? | _  0 =no; 1 = yes                                                             |
| [ALLEXCL]  | Did patient meet any exclusion criteria? | _  0 =no, 1 = yes                                                             |
|            | <i>If ALLINCL=1 or ALLEXCL=1:</i>        |                                                                               |
| [ELIGCOM]  | Comments on eligibility                  | [FREE TEXT]                                                                   |
| [DDIAG]    | Date of first histological diagnosis     | DD/ MM/ YYYY                                                                  |
| [HEIGHT]   | Height                                   | _ _ _  cm                                                                     |
| [WEIGHT]   | Weight                                   | _ _ _  kg                                                                     |
| [CUPSIZE]  | Breast cup size                          | _ _ _  (f.e. 80B)                                                             |
| [SMOKSTAT] | Smoking status                           | _  0 = never smoked<br>1 = former smoker<br>2 = current smoker<br>9 = unknown |
| [DM]       | Diabetes Mellitus                        | _  0 = no<br>1 = insulin dependent<br>2 = not insulin dependent               |
| [HT]       | Hypertension                             | _  0=no; 1=yes                                                                |
| [CVRF]     | History of MI, CVA, PAOD?                | _  0=no; 1=yes                                                                |
| [ADJTX]    | adjuvant therapy before/after PBSI       | _  0 = no<br>1 = chemo<br>2 = hormone<br>3 = chemo+ hormone                   |

## EMC 16-400

### A MULTICENTER RANDOMIZED CONTROLLED TRIAL TESTING HYALURONIC ACID SPACER INJECTION FOR SKIN TOXICITY REDUCTION OF PERMANENT BREAST SEED IMPLANT (PBSI)

If ADJTX>0:

|            |                            |                |
|------------|----------------------------|----------------|
| [STARTHTX] | Start date hormone therapy | DD / MM / YYYY |
| [STARTCTX] | Start date chemotherapy    | DD / MM / YYYY |
| [STOPCTX]  | Date of last chemotherapy  | DD/ MM/ YYYY   |

[SURGDATE] Date of surgery: DD / MM / YYYY

[SURGTYPE] Type of surgery: |\_\_| 1 = BCS + axillary lymphnode dissection  
2 = BCS + sentinel lymphnode biopsy

[SSI] Surgical Site Infection (CDC) |\_\_| 0 = none  
1 = superficial incisional SSI  
2 = deep incisional SSI

#### CRF: Tumor Characteristics

|     |                             |      |
|-----|-----------------------------|------|
| [T] | T (NM)-classification 1997  | T __ |
| [N] | (T)N(M)-classification 1997 | N __ |
| [M] | (TN)M-classification 1997   | M __ |

[STAGE] Clinical Stage |\_\_| 0 = stage 0  
1 = stage 1  
11 = stage 1b  
2 = stage 2a  
22 = stage 2b  
3 = stage 3a  
33 = stage 3b  
333 = stage 3c  
4 = stage 4

## EMC 16-400

### A MULTICENTER RANDOMIZED CONTROLLED TRIAL TESTING HYALURONIC ACID SPACER INJECTION FOR SKIN TOXICITY REDUCTION OF PERMANENT BREAST SEED IMPLANT (PBSI)

|             |                                             |          |                                                                                                                                                                                                                   |
|-------------|---------------------------------------------|----------|-------------------------------------------------------------------------------------------------------------------------------------------------------------------------------------------------------------------|
| [TUMLAT]    | Tumor laterality                            | __       | 1 = <i>left</i><br>2 = <i>right</i>                                                                                                                                                                               |
| [TUMSITE]   | Tumor anatomical subsite                    | __       | 1 = <i>nipple</i><br>2 = <i>central</i><br>3 = <i>upper- inner quadrant</i><br>4 = <i>lower- inner quadrant</i><br>5 = <i>upper-outer quadrant</i><br>6 = <i>lower-outer quadrant</i><br>7 = <i>axillary tail</i> |
| [TUMORSIZE] | Tumor size                                  | __ __    | mm                                                                                                                                                                                                                |
| [DISTSKIN]  | Distance tumor to skin                      | __ __ __ | mm                                                                                                                                                                                                                |
| [MARGIN]    | Resection margin status                     | __       | 0 = <i>tumor free at ink (IDC)</i><br><i>or &gt;2mm for DCIS</i><br>1 = <i>focal irradical or</i><br><i>&lt;2mm for DCIS</i><br>2 = <i>irradical</i><br>9 = <i>unknown</i>                                        |
| [HISTOL]    | Histological Diagnosis                      | __       | 1 = <i>IDC</i><br>2 = <i>DCIS</i><br>3 = <i>IDC+DCIS</i><br>4 = <i>other, .....</i>                                                                                                                               |
| [HISTCOM]   | <i>IF HISTOL=4 please specify FREE TEXT</i> |          |                                                                                                                                                                                                                   |
| [TUMGRAD]   | Modified Scarf-Bloom-Richardson grade       | __       |                                                                                                                                                                                                                   |
| [PR]        | PR-receptor status                          | __       | 0 = <i>negative</i><br>1 = <i>positive</i>                                                                                                                                                                        |
| [ER]        | ER-receptor status                          | __       | 0 = <i>negative</i><br>1 = <i>positive</i>                                                                                                                                                                        |
| [HER2NEU]   | Her-2neu -receptor status                   | __       | 0 = <i>negative</i><br>1 = <i>positive</i>                                                                                                                                                                        |
| [LVI]       | Lymfovascular Invasion                      | __       | 0 = <i>no</i><br>1 = <i>yes</i>                                                                                                                                                                                   |

## EMC 16-400

### A MULTICENTER RANDOMIZED CONTROLLED TRIAL TESTING HYALURONIC ACID SPACER INJECTION FOR SKIN TOXICITY REDUCTION OF PERMANENT BREAST SEED IMPLANT (PBSI)

|           |                                                         |    |                   |
|-----------|---------------------------------------------------------|----|-------------------|
| [MULTI]   | multicentricity                                         | __ | 0 = no<br>1 = yes |
| [EXTDCIS] | Extensive DCIS (beyond invasive tumor, or >3cm)         | __ | 0 = no<br>1 = yes |
| [BILAT]   | Bilateral breast cancer?                                | __ | 0 = no<br>1 = yes |
| [RECUR}   | Recurrent breast cancer?                                | __ | 0 = no<br>1 = yes |
| [ACTOTH]  | Active other cancer (defined by malignancy in <5 year?) | __ | 0 = no<br>1 = yes |



## EMC 16-400

### A MULTICENTER RANDOMIZED CONTROLLED TRIAL TESTING HYALURONIC ACID SPACER INJECTION FOR SKIN TOXICITY REDUCTION OF PERMANENT BREAST SEED IMPLANT (PBSI)

#### CRF: Baseline Adverse Events (as close as possible to start PBSI)

|               |                                                                                                                                                                |                                                                                                                                                                                                          |
|---------------|----------------------------------------------------------------------------------------------------------------------------------------------------------------|----------------------------------------------------------------------------------------------------------------------------------------------------------------------------------------------------------|
| [AEDATE]      | Date of AE assessment                                                                                                                                          | DD / MM/ YYYY                                                                                                                                                                                            |
| [BASPAIN]     | Baseline pain in breast                                                                                                                                        | __  0 = none<br>1 = occasional and minimal, hypersensation, pruritus<br>2 = intermittent and tolerable<br>3 = persistent and intense<br>4 = refractory and excruciating                                  |
| [BASSSI]      | Baseline Surgical Site Infection                                                                                                                               | __  0 = none<br>1 = superficial SSI<br>2 = deep SSI                                                                                                                                                      |
| [BASTELEANG]  | Baseline Teleangiectasia (Bentzen scale)                                                                                                                       | __  0 = none<br>1 = grade I – less than 1cm <sup>2</sup><br>2 = grade II – 1 to 4 cm <sup>2</sup><br>3 = grade III – over 4 cm <sup>2</sup>                                                              |
| [BASSUBINDUR] | Baseline Subcutaneous Induration                                                                                                                               | __  0 = none<br>1 = slight induration and loss of subcutaneous fat<br>2 = moderate fibrosis but asymptomatic<br>3 = severe induration and loss of subcutaneous tissue; field contracture<br>4 = necrosis |
| [BASPIGM]     | Baseline pigmentation                                                                                                                                          | __  0 = none<br>1 = transitory, slight<br>2 = permanent, marked                                                                                                                                          |
| [OTHERAE]     | Any other AE?<br>in grid/table (multiple entries possible):                                                                                                    | __  0=no, 1=yes *If yes, enter                                                                                                                                                                           |
|               | <ul style="list-style-type: none"><li>- System organ Class (conform CTCAE4/MEDRA)</li><li>- AE term (conform CTCAE4/MEDRA)</li><li>- CTC grade (1-4)</li></ul> |                                                                                                                                                                                                          |

## EMC 16-400

### A MULTICENTER RANDOMIZED CONTROLLED TRIAL TESTING HYALURONIC ACID SPACER INJECTION FOR SKIN TOXICITY REDUCTION OF PERMANENT BREAST SEED IMPLANT (PBSI)

#### CRF: Pre-implant QA

##### Group: General

[PLANCT1] Date of planning CT scan DD / MM / YYYY

[PRECTV] CTV |\_\_|\_|\_|.|\_|| cc

[PREPTV] PTV |\_\_|\_|\_|.|\_|| cc

[PRESEEDNUM] Total number of seeds |\_\_|\_|\_|

[PRENEEDNUM] Total number of needles |\_\_|\_|\_|

[TOTACT] Total activity of seeds |\_\_|\_|\_|.|\_||U

[PRESKINPTV] minimal distance skin to PTV |\_\_|\_|\_|.|\_||mm

[PRESKINISO] distance between CTV isocenter and skin |\_\_|\_|\_|.|\_||mm

##### Group: DVH parameters

[PREV100] Pre-implant V100 |\_\_|\_|\_|.|\_|| %

[PREV200] Pre-implant V200 |\_\_|\_|\_|.|\_|| %

[PRED90] Pre-implant D90 |\_\_|\_|\_|.|\_|| cc

[PRESK90] Pre-implant skin isodose>90% over 1cm<sup>2</sup> |\_\_| 0=no, 1=yes

[PREDO.2] Pre-implant D0.2cc skin dose |\_\_|\_|\_|.|\_|| Gy

[PREDO.05] Pre-implant D0.05cc skin dose |\_\_|\_|\_|.|\_|| Gy

#### CRF: PBSI +/- SPACER

[PBSIDATE] Date of PBSI procedure DD / MM / YYYY

[PBSIDUR] Duration of PBSI procedure |\_\_|\_|\_|min

[PBSIDIFF] any difficulties in PBSI procedure, please specify.....

## EMC 16-400

### A MULTICENTER RANDOMIZED CONTROLLED TRIAL TESTING HYALURONIC ACID SPACER INJECTION FOR SKIN TOXICITY REDUCTION OF PERMANENT BREAST SEED IMPLANT (PBSI)

[SPACER] Spacer administered |\_\_| 0=no; 1=yes

[SPACDUR] Duration of spacer injection procedure |\_\_|\_\_|\_\_| min

[SPACMCR] Spacer administered in mediocranial quadrant of skin projection |\_\_| 0=no, 1=yes

[SPACMCA] Spacer administered in mediocaudal quadrant of skin projection |\_\_| 0=no, 1=yes

[SPACLCA] Spacer administered in laterocaudal quadrant of skin projection |\_\_| 0=no, 1=yes

[SPACLCR] Spacer administered in laterocranial quadrant of skin projection |\_\_| 0=no, 1=yes

If SPACER=1: [SPACVOL] Volume of spacer administered |\_\_|\_\_|\_\_|\_\_| cc  
(enter 9999 if not recorded)

[SPACDIFF] any difficulties in spacer injection, please specify:.....

[USSPATRANCEN] mid spacer thickness central transversal plane on ultrasound |\_\_|\_\_|. |\_\_| mm

[USSPATRANCRA] mid spacer thickness cranial transversal plane on US |\_\_|\_\_|. |\_\_| mm

[USSPATRANCAU] mid spacer thickness caudal transversal plane on US |\_\_|\_\_|. |\_\_| mm

[USSPASAGCEN] mid spacer thickness central saggital plane on US |\_\_|\_\_|. |\_\_| mm

[USSPASAGLAT] mid spacer thickness lateral saggital plane on US |\_\_|\_\_|. |\_\_| mm

[USSPASAGMED] mid spacer thickness medial saggital panel on US |\_\_|\_\_|. |\_\_| mm

[SPASUC] Spacer injection successful (>5mm in all injected quadrants) |\_\_| 0=no, 1=yes

## EMC 16-400

### A MULTICENTER RANDOMIZED CONTROLLED TRIAL TESTING HYALURONIC ACID SPACER INJECTION FOR SKIN TOXICITY REDUCTION OF PERMANENT BREAST SEED IMPLANT (PBSI)

#### CRF: treatment pain

|            |                                                             |    |     |
|------------|-------------------------------------------------------------|----|-----|
| [PAINBAS]  | Pain before procedure (baseline, LENTSOMA)                  | __ | 0-4 |
| [PAINPBSI] | Pain during procedure (baseline, LENTSOMA)                  | __ | 0-4 |
| [PAINPOST] | Maximum pain after procedure (1-2 d post-implant, LENTSOMA) | __ | 0-4 |

## EMC 16-400

### A MULTICENTER RANDOMIZED CONTROLLED TRIAL TESTING HYALURONIC ACID SPACER INJECTION FOR SKIN TOXICITY REDUCTION OF PERMANENT BREAST SEED IMPLANT (PBSI)

#### CRF: Adverse Events 2 months

|              |                                       |                                                                                                                                                                                                                                                                                                                               |
|--------------|---------------------------------------|-------------------------------------------------------------------------------------------------------------------------------------------------------------------------------------------------------------------------------------------------------------------------------------------------------------------------------|
| [2MASSDATE]  | Date of AE assessment                 | DD / MM / YYYY                                                                                                                                                                                                                                                                                                                |
| [2MPAIN]     | pain in breast                        | __  0 = none<br>1 = occasional and minimal, hypersensation, pruritus<br>2 = intermittent and tolerable<br>3 = persistent and intense<br>4 = refractory and excruciating                                                                                                                                                       |
| [2MPAINS]    | If AEPAIN>0: Was AE serious(SAE)?     | __  0=no, 1=yes                                                                                                                                                                                                                                                                                                               |
| [2MRED]      | Redness                               | __  0 =none<br>1 = yes but no effect on ADL<br>2 = yes and effect on ADL                                                                                                                                                                                                                                                      |
| [2MREDS]     | If AERED >0: Was AE serious(SAE)?     | __  0=no, 1=yes                                                                                                                                                                                                                                                                                                               |
| [2MPIGM]     | Pigmentation                          | __  0 = none<br>1 = transitory, slight<br>2 = permanent, marked                                                                                                                                                                                                                                                               |
| [2MPIGMS]    | If AEPIGM >0: Was AE serious(SAE)?    | __  0=no, 1=yes                                                                                                                                                                                                                                                                                                               |
| [2MSKININD]  | Skin induration                       | __  0 = none<br>1 = Mild induration, able to move skin parallel to plane (sliding) and perpendicular to skin (pinching up)<br>2 = Moderate induration, able to slide skin, unable to pinch skin; limiting instrumental ADL<br>3 = Severe induration, unable to slide or pinch skin; limiting self-care ADL<br>4 = Generalized |
| [2MSKININDS] | If AESKININD >0: Was AE serious(SAE)? | __  0=no, 1=yes                                                                                                                                                                                                                                                                                                               |

## EMC 16-400

### A MULTICENTER RANDOMIZED CONTROLLED TRIAL TESTING HYALURONIC ACID SPACER INJECTION FOR SKIN TOXICITY REDUCTION OF PERMANENT BREAST SEED IMPLANT (PBSI)

|                  |                                                                                |                          |                                                                                                                                                                                                                                                                                                                                                                                                                         |
|------------------|--------------------------------------------------------------------------------|--------------------------|-------------------------------------------------------------------------------------------------------------------------------------------------------------------------------------------------------------------------------------------------------------------------------------------------------------------------------------------------------------------------------------------------------------------------|
| [2MRADDERM]      | Radiation dermatitis                                                           | <input type="checkbox"/> | 0 = none<br>1 = Faint erythema or dry desquamation<br>2 = Moderate to brisk erythema; patchy moist desquamation, mostly confined to skin folds and creases; moderate edema<br>3 = Moist desquamation in areas other than skin folds and creases; bleeding induced by minor trauma or abrasion<br>4 = skin necrosis/ulceration of full thickness dermis; spontaneous bleeding from involved site; (skin graft indicated) |
| [2MRADDERMS]     | If AERADDERM >0:<br>Was AE serious(SAE)?                                       | <input type="checkbox"/> | 0=no, 1=yes                                                                                                                                                                                                                                                                                                                                                                                                             |
| [2MSKINTOXDIST]  | Distance of clinical max skintoxicity from reference point (nipple lowerinner) | <input type="text"/>     | mm                                                                                                                                                                                                                                                                                                                                                                                                                      |
| [2MSKINTOXANGLE] | Angle of clinical max skintoxicity from reference point (nipple lowerinner)    | <input type="text"/>     | 0-360°                                                                                                                                                                                                                                                                                                                                                                                                                  |
| [2MSSI]          | Surgical Site Infection                                                        | <input type="checkbox"/> | 0 = none<br>1 = superficial SSI<br>2 = deep SSI                                                                                                                                                                                                                                                                                                                                                                         |
| [2MSSIS]         | If AESSI >0: Was AE serious(SAE)?                                              | <input type="checkbox"/> | 0=no, 1=yes                                                                                                                                                                                                                                                                                                                                                                                                             |
| [2MOTHERAE]      | Any other RT (or spacer) induced AE?                                           | <input type="checkbox"/> | 0=no; 1=yes                                                                                                                                                                                                                                                                                                                                                                                                             |

## EMC 16-400

### A MULTICENTER RANDOMIZED CONTROLLED TRIAL TESTING HYALURONIC ACID SPACER INJECTION FOR SKIN TOXICITY REDUCTION OF PERMANENT BREAST SEED IMPLANT (PBSI)

If OTHERAE=yes: Enter in grid/table (multiple entries possible):

- System organ Class (drop down list conform CTCAE4/MEDRA)
- AE term (drop down list conform CTCAE4/MEDRA)
- Worst grade observed since last AE evaluation (1-5)
- Serious: yes/no

#### CRF: Post-implant QA

##### Group: general postplanning CT variables

|                 |                                                                   |                |
|-----------------|-------------------------------------------------------------------|----------------|
| [PLANCT2]       | Date of post-implant CT scan                                      | DD/ MM/ YYYY   |
| [POSTCTV]       | post-implant CTV                                                  | _ _ . _  cc    |
| [POSTVOL]       | post-implant treatment volume with Minimal peripheral dose (90Gy) | _ _ _ . _  cc  |
| [POSTSEEDNUM]   | Total number of seeds                                             | _ _ _          |
| [SEEDDISPLACED] | any seeds displaced>1 cm                                          | _  0=no, 1=yes |
| [DISPSPEC]      | <i>If SEEDDISPLACED =1: Specify</i>                               | [FREE TEXT]    |
| [POSTVOLSKIN]   | minimal distance skin to POSTVOL                                  | _ _ . _  mm    |
| [POSTISOSKIN]   | distance between CTV isocenter and skin                           | _ _ . _  mm    |

##### Group: DVH parameters on CT

|              |                          |               |
|--------------|--------------------------|---------------|
| [POSTV100]   | post-implant V100        | _ _ _ . _  %  |
| [POSTV200]   | post -implant V200       | _ _ _ . _  %  |
| [POSTD90VOL] | post-implant D90 of skin | _ _ _ . _  cc |

## EMC 16-400

### A MULTICENTER RANDOMIZED CONTROLLED TRIAL TESTING HYALURONIC ACID SPACER INJECTION FOR SKIN TOXICITY REDUCTION OF PERMANENT BREAST SEED IMPLANT (PBSI)

|            |                                                     |                   |
|------------|-----------------------------------------------------|-------------------|
| [POSTSK90] | post-implant skin isodose>90% over 1cm <sup>2</sup> | __  0=no, 1=yes   |
| [POSTD02]  | post-implant D0.2cc skin dose                       | __ __ __ . __  Gy |
| [POSTD005] | post-implant D0.05cc skin dose                      | __ __ __ . __  Gy |

#### Group: spacer measurements on CT at 2 months

|             |                                                     |                 |
|-------------|-----------------------------------------------------|-----------------|
| [CTSPACER]  | any spacer visible on CT                            | __  0=no, 1=yes |
| [CTSPACMCR] | spacer in mediocranial quadrant of skin projection  | __  0=no, 1=yes |
| [CTSPACMCA] | spacer in mediocaudal quadrant of skin projection   | __  0=no, 1=yes |
| [CTSPACLCA] | spacer in laterocaudal quadrant of skin projection  | __  0=no, 1=yes |
| [CTSPACLCR] | spacer in laterocranial quadrant of skin projection | __  0=no, 1=yes |

If SPACER=1:

|                |                                                      |                 |
|----------------|------------------------------------------------------|-----------------|
| [CTSPACVOL]    | Volume of spacer on CT                               | __ __ __ __  cc |
| [CTSPATRANCEN] | mid spacer thickness central transversal plane on CT | __ __ . __  mm  |
| [CTSPATRANCRA] | mid spacer thickness cranial transversal plane on CT | __ __ . __  mm  |
| [CTSPATRANCAU] | mid spacer thickness caudal transversal plane on CT  | __ __ . __  mm  |
| [CTSPASAGCEN]  | mid spacer thickness central saggital plane on CT    | __ __ . __  mm  |
| [CTSPASAGLAT]  | mid spacer thickness lateral saggital plane on CT    | __ __ . __  mm  |
| [CTSPASAGMED]  | mid spacer thickness medial saggital plane on CT     | __ __ . __  mm  |

#### Group: gafchromic film skin dose measurement

|            |                       |                 |
|------------|-----------------------|-----------------|
| [FILMUSED] | gafchromic film used? | __  0=no, 1=yes |
|------------|-----------------------|-----------------|

IF FILMUSED=1 than



## EMC 16-400

### A MULTICENTER RANDOMIZED CONTROLLED TRIAL TESTING HYALURONIC ACID SPACER INJECTION FOR SKIN TOXICITY REDUCTION OF PERMANENT BREAST SEED IMPLANT (PBSI)

|               |                                                                                   |                   |
|---------------|-----------------------------------------------------------------------------------|-------------------|
| [FILMMAX]     | maximum point skindose on film                                                    | _ _ _ .  _  Gy    |
| [FILMMAX1CM]  | maximum skindose on film over at least 1cm <sup>2</sup>                           | _ _ _ .  _  Gy    |
| [FILMAUC]     | AUC skindose on film                                                              | _ _ _ .  _  Gy*cm |
| [FILMLOCDIST] | Distance of max point skindose on film from reference point (projected isocenter) | _ _ _ .  _  mm    |
| [FILMLOCANG]  | Angle of max point skindose on film from reference point (projected isocenter)    | _ _ _  0-360°     |

#### CRF: Survival and recurrence

|            |                                                                                                |                                                    |
|------------|------------------------------------------------------------------------------------------------|----------------------------------------------------|
| [FUDATE]   | Date last known to be alive / date of death                                                    | DD/MM/YYYY                                         |
| [SURVIVAL] | Survival status                                                                                | _  1 = alive<br>2 = death<br>8 = lost to follow-up |
| [RADDATE]  | Date last mammography or CT-scan                                                               | DD/MM/YYYY [ ]not done                             |
| [RECURR]   | Any recurrent disease (not yet reported)<br><i>If yes, please complete the recurrence form</i> | _  0=no; 1=yes                                     |

## EMC 16-400

### A MULTICENTER RANDOMIZED CONTROLLED TRIAL TESTING HYALURONIC ACID SPACER INJECTION FOR SKIN TOXICITY REDUCTION OF PERMANENT BREAST SEED IMPLANT (PBSI)

#### CRF: Recurrence

Please report/update all recurrences until start of a new anticancer treatment

|                   |                                                                     |             |                                                                                                                                                                                                                    |
|-------------------|---------------------------------------------------------------------|-------------|--------------------------------------------------------------------------------------------------------------------------------------------------------------------------------------------------------------------|
| [LREC]            | <b>Local recurrence (<i>ipsilateral breast/chestwall</i>)</b>       | __          | 0=no; 1=yes                                                                                                                                                                                                        |
| <i>If LREC=1:</i> |                                                                     |             |                                                                                                                                                                                                                    |
| [LRECDATE]        | Date of local recurrence                                            |             | DD/MM/ YYYY                                                                                                                                                                                                        |
| [LRECLOC]         | Localization of local recurrence  __                                |             | 1 = ipsilateral breast same quadrant<br>2 = ipsilateral breast other quadrant<br>3 = ipsilateral chest wall same quadrant<br>4 = ipsilateral chest wall other quadrant<br>5 = ipsilateral, location not documented |
| [LRECHIS]         | Cyt/hist proof of recurrence                                        | __          | 0 = no; 1=yes                                                                                                                                                                                                      |
| [LRECPATH]        | Local recurrence of disease under study confirmed by pathologist    | __          | 0 = no, (probably) a new primary tumor<br>1 = yes, (probably) a local recurrence<br>2 = uncertain, specify                                                                                                         |
| [SLRECDIA]        | Comments on diagnosis                                               | [FREE TEXT] |                                                                                                                                                                                                                    |
| [RREC]            | <b>Regional recurrence (<i>ipsilateral lymphnodes/axilla</i>)</b>   | __          | 0=no; 1=yes                                                                                                                                                                                                        |
| <i>If RREC=1:</i> |                                                                     |             |                                                                                                                                                                                                                    |
| [RRECDATE]        | Date of regional recurrence                                         |             | DD/MM/ YYYY                                                                                                                                                                                                        |
| [RRECLOC]         | Localization of regional recurrence  __                             |             | 1 = internal mammary chain<br>2 = supraclavicular area<br>3 = axilla                                                                                                                                               |
| [RRECHIS]         | Cyt/hist proof of regional recurrence                               | __          | 0 = no; 1=yes                                                                                                                                                                                                      |
| [RRECPATH]        | Regional recurrence of disease under study confirmed by pathologist | __          | 0 = no, (probably) other tumor                                                                                                                                                                                     |

## EMC 16-400

### A MULTICENTER RANDOMIZED CONTROLLED TRIAL TESTING HYALURONIC ACID SPACER INJECTION FOR SKIN TOXICITY REDUCTION OF PERMANENT BREAST SEED IMPLANT (PBSI)

|             |                                                                                      |                                                                                                                                                       |
|-------------|--------------------------------------------------------------------------------------|-------------------------------------------------------------------------------------------------------------------------------------------------------|
| [SRRECDIA]  |                                                                                      | <i>1 = yes, (probably) regional recurrence</i><br><i>2 = uncertain, specify</i><br>[FREE TEXT]                                                        |
| [DMET]      | <b>Distant metastases</b>                                                            | __  <i>0=no; 1=yes</i>                                                                                                                                |
|             | <i>If DMET=1:</i>                                                                    |                                                                                                                                                       |
| [DMETDATE]  | Date of distant metastases                                                           | DD/MM/ YYYY                                                                                                                                           |
| [DMETHIS]   | Cyt/hist proof of distant metastases                                                 | __  <i>0 = no; 1=yes</i>                                                                                                                              |
| [DMETPATH]  | Distant metastases from disease under study confirmed by pathologist                 | __  <i>0 = no, (probably) (from) other primary tumor</i><br><i>1 = yes, (probably)from disease under study</i><br><i>2 = uncertain, specify</i>       |
| [DMETDIA]   | Comments on diagnosis                                                                | [FREE TEXT]                                                                                                                                           |
| [PLANTRTM]  | Planned further treatment<br><br><i>(only first anticancer treatment after PBSI)</i> | __  <i>0= none</i><br><i>1= mastectomy</i><br><i>2= radiotherapy</i><br><i>3= chemotherapy</i><br><i>4= targeted therapy</i><br><i>5= combination</i> |
| [SPLANTRTM] | Specify: _____                                                                       | [FREE TEXT]                                                                                                                                           |

*If locoregional or distant recurrence, follow-up local recurrence*

## EMC 16-400

### A MULTICENTER RANDOMIZED CONTROLLED TRIAL TESTING HYALURONIC ACID SPACER INJECTION FOR SKIN TOXICITY REDUCTION OF PERMANENT BREAST SEED IMPLANT (PBSI)

#### CRF: Adverse Events 6 months and year 1-5

|              |                                       |                                                                                                                                                                                              |
|--------------|---------------------------------------|----------------------------------------------------------------------------------------------------------------------------------------------------------------------------------------------|
| [AEDATE]     | Date of AE assessment                 | DD / MM / YYYY                                                                                                                                                                               |
| [AETELEANG]  | Telangiectasia (Bentzen scale)        | <input type="checkbox"/> 0 = none<br>1 = grade I – less than 1cm <sup>2</sup><br>2 = grade II – 1 to 4 cm <sup>2</sup><br>3 = grade III – over 4 cm <sup>2</sup>                             |
| [AETELEANGS] | If AETELEANG >0: Was AE serious(SAE)? | <input type="checkbox"/> 0=no, 1=yes                                                                                                                                                         |
| [AEPAIN]     | pain in breast                        | <input type="checkbox"/> 0 = none<br>1 = occasional and minimal, hypersensation, pruritus<br>2 = intermittent and tolerable<br>3 = persistent and intense<br>4 = refractory and excruciating |
| [AEPAINS]    | If AEPAIN>0: Was AE serious(SAE)?     | <input type="checkbox"/> 0=no, 1=yes                                                                                                                                                         |
| [AERED]      | Redness                               | <input type="checkbox"/> 0 =none<br>1 = yes but no effect on ADL<br>2 = yes and effect on ADL                                                                                                |
| [AEREDS]     | If AERED >0: Was AE serious(SAE)?     | <input type="checkbox"/> 0=no, 1=yes                                                                                                                                                         |
| [AEPIGM]     | Pigmentation                          | <input type="checkbox"/> 0 = none<br>1 = transitory, slight<br>2 = permanent, marked                                                                                                         |
| [AEPIGMS]    | If AEPIGM >0: Was AE serious(SAE)?    | <input type="checkbox"/> 0=no, 1=yes                                                                                                                                                         |
| [AESKININD]  | Skin induration                       | <input type="checkbox"/> 0 = none<br>1 = Mild induration, able to move skin parallel to plane (sliding) and perpendicular to skin (pinching up)                                              |

## EMC 16-400

### A MULTICENTER RANDOMIZED CONTROLLED TRIAL TESTING HYALURONIC ACID SPACER INJECTION FOR SKIN TOXICITY REDUCTION OF PERMANENT BREAST SEED IMPLANT (PBSI)

2 = Moderate induration, able to slide skin, unable to pinch skin; limiting instrumental ADL  
3 = Severe induration, unable to slide or pinch skin; limiting self-care ADL  
4 = Generalized

[AESKININDS] If AESKININD >0: Was AE serious(SAE)? |\_\_| 0=no, 1=yes

[AESUBIND] Subcutaneous Induration |\_\_| 0 =none  
1 = slight induration and loss of subcutaneous fat  
2 =moderate fibrosis but asymptomatic  
3 =severe induration and loss of subcutaneous tissue; field contracture  
4 =necrosis

[AESUBINDS] If AESUBIND >0: Was AE serious(SAE)? |\_\_| 0=no, 1=yes

[OTHERAE] Any other RT (or spacer) induced AE? |\_\_| 0=no; 1=yes

If OTHERAE=yes: Enter in grid/table (multiple entries possible):

- System organ Class (drop down list conform CTCAE4/MEDRA)
- AE term (drop down list conform CTCAE4/MEDRA)
- Worst grade observed since last AE evaluation (1-5)
- Serious: yes/no

## EMC 16-400

### A MULTICENTER RANDOMIZED CONTROLLED TRIAL TESTING HYALURONIC ACID SPACER INJECTION FOR SKIN TOXICITY REDUCTION OF PERMANENT BREAST SEED IMPLANT (PBSI)

#### CRF: Off-study

|                      |                               |    |                                                                                                                                                                                                                                         |
|----------------------|-------------------------------|----|-----------------------------------------------------------------------------------------------------------------------------------------------------------------------------------------------------------------------------------------|
| [DOFF]               | Date off-study                |    | DD / MM / YYYY                                                                                                                                                                                                                          |
| [OFFREAS]            | Reason off-study              | __ | <i>1 = end of follow-up period, without recurrence<br/>2 = recurrent disease<br/>3 = start systemic/locoregional anti-cancer treatment/ breast surgery<br/>4 = death<br/>5 = patient withdrawal<br/>6 = ineligibility<br/>7 = other</i> |
| [SPOFFREAS]          | Specify reason off-study      |    | [FREE TEXT]                                                                                                                                                                                                                             |
| <i>If OFFREAS=3:</i> |                               |    |                                                                                                                                                                                                                                         |
| [CODEATH]            | Cause of death                | __ | <i>1 = Breast cancer<br/>2 = Concurrent disease<br/>3 = Treatment related toxicity<br/>4 = Other</i>                                                                                                                                    |
| [SPCODEATH]          | Specify cause of death        |    | [FREE TEXT]                                                                                                                                                                                                                             |
| [SEEDMIGR]           | Any known seed migration?     | __ | <i>0=no; 1=yes</i>                                                                                                                                                                                                                      |
| [MIGRSPEC]           | <i>If SEEDMIGR=1: Specify</i> |    | [FREE TEXT]                                                                                                                                                                                                                             |

**EMC 16-400**

**A MULTICENTER RANDOMIZED CONTROLLED TRIAL TESTING HYALURONIC ACID SPACER INJECTION FOR SKIN TOXICITY REDUCTION OF PERMANENT BREAST SEED IMPLANT (PBSI)**

**CRF: Primary endpoint assessment** (will initially be entered on paper CRF during clinical assessment, and entered in e-CRF later)

Date of assessment  DD / MM / YYYY

Physician who scored primary endpoint \_\_\_\_\_

[TELANG] Teleangiectasia (Bentzen)  |  | *0 = none*  
*1 = grade I – less than 1cm<sup>2</sup>*  
*2 = grade II – 1 to 4 cm<sup>2</sup>*  
*3 = grade III – over 4 cm<sup>2</sup>*

Evaluability of primary endpoint:  |  | *0=non-evaluable; 1=evaluable*

If non-evaluable, reason:  | Re-irradiation on ipsilateral breast/chestwall < 2 yrs post-treatment

Re-surgery on ipsilateral breast/chestwall < 2 yrs post treatment

Death < 2 yrs post treatment

Lost to follow-up < 2 yrs post treatment

other, specify

Specify [FREE TEXT]
